# Supplementary material for: Do short birth intervals have long-term implications for parental health? Results from analyses of complete cohort Norwegian register data
Source: PubMed Central journal article supplement — J Epidemiol Community Health. 2014 Jul 9;68(10):958–64. doi: 10.1136/jech-2014-204191 (PMC4174138; doi:10.1136/jech-2014-204191), 2014-07-09
Supplement: jech-2014-204191-s1.pdf [file jech-2014-204191-s1.pdf]

**Supplemental Table: 1** Distribution by length of inter-birth interval, education, marital status, age at first birth, parity, and whether there had been a change of co-parent since previous birth

a) Interval from second to third birth (parents with 3 or 4 children)

|                                    |               | Men |      |       |       |       |       |      |        | Women                                  |      |      |       |       |       |       |      |        |                     |
|------------------------------------|---------------|-----|------|-------|-------|-------|-------|------|--------|----------------------------------------|------|------|-------|-------|-------|-------|------|--------|---------------------|
|                                    |               |     |      |       |       |       |       |      |        | Interval since previous birth (months) |      |      |       |       |       |       |      |        |                     |
|                                    |               | 0   | 1-17 | 18-29 | 30-41 | 42-59 | 60-89 | 90+  | Deaths | Person years (000s)                    | 0    | 1-17 | 18-29 | 30-41 | 42-59 | 60-89 | 90+  | Deaths | Person years (000s) |
| <b>Education</b>                   | 10 years      | 1.9 | 9.8  | 19.1  | 16.4  | 19.5  | 18.3  | 15.1 | 8042   | 1243.4                                 | 1.8  | 9.6  | 18.6  | 15.8  | 19.7  | 19.4  | 15.2 | 6732   | 1716.8              |
|                                    | 11-13         | 2.2 | 7.3  | 17.4  | 16.1  | 20.9  | 20.4  | 15.7 | 9556   | 2246.5                                 | 2.2  | 7.8  | 17.9  | 16.1  | 21.1  | 20.5  | 14.4 | 5611   | 2333.9              |
|                                    | 14-17         | 2.6 | 5.6  | 17.4  | 17.8  | 22.2  | 20.4  | 14.0 | 2585   | 943.9                                  | 2.6  | 5.8  | 19.5  | 18.5  | 22.9  | 19.4  | 11.3 | 1529   | 1021.7              |
|                                    | 18+           | 2.7 | 4.8  | 20.0  | 20.1  | 23.2  | 17.8  | 11.5 | 992    | 452.9                                  | 3.3  | 4.4  | 22.1  | 21.6  | 22.7  | 16.8  | 9.0  | 124    | 115.5               |
| <b>Marital status</b>              | Never-married | 4.5 | 6.5  | 20.0  | 17.8  | 19.4  | 18.0  | 13.8 | 250    | 102.9                                  | 5.0  | 6.5  | 19.1  | 16.3  | 17.9  | 18.2  | 17.0 | 124    | 81.4                |
|                                    | Married       | 2.2 | 7.1  | 18.0  | 17.1  | 21.7  | 20.1  | 13.8 | 14673  | 4019.4                                 | 2.1  | 7.5  | 18.2  | 16.8  | 21.8  | 20.4  | 13.3 | 9089   | 4050.8              |
|                                    | Div/sep       | 2.2 | 8.8  | 18.2  | 15.5  | 17.4  | 16.8  | 21.2 | 5557   | 706.1                                  | 2.2  | 9.4  | 19.3  | 15.7  | 18.1  | 17.8  | 17.5 | 3161   | 793.9               |
|                                    | Widowed       | 1.8 | 9.0  | 19.5  | 16.3  | 19.7  | 19.0  | 14.7 | 695    | 58.3                                   | 1.7  | 10.3 | 21.0  | 16.4  | 20.0  | 18.4  | 12.2 | 1622   | 261.8               |
| <b>Age at 1<sup>st</sup> birth</b> | <20           | 1.0 | 9.7  | 17.5  | 14.3  | 18.4  | 17.3  | 22.0 | 985    | 167.5                                  | 1.2  | 9.8  | 17.8  | 14.8  | 18.2  | 18.9  | 19.2 | 3206   | 910.2               |
|                                    | 20-22         | 1.4 | 8.6  | 17.0  | 15.0  | 18.7  | 19.4  | 19.9 | 5360   | 998.8                                  | 1.6  | 8.6  | 17.7  | 15.2  | 20.1  | 20.5  | 16.3 | 5486   | 1851.3              |
|                                    | 23-25         | 1.8 | 7.7  | 17.0  | 15.9  | 20.7  | 20.4  | 16.5 | 7101   | 1545.9                                 | 2.2  | 6.9  | 17.9  | 16.9  | 22.4  | 21.1  | 12.7 | 3344   | 1376.7              |
|                                    | 26-28         | 2.3 | 6.5  | 17.8  | 17.4  | 22.0  | 20.7  | 13.2 | 4468   | 1190.2                                 | 3.2  | 6.2  | 19.4  | 19.0  | 23.8  | 19.9  | 8.4  | 1355   | 696.3               |
|                                    | 29-31         | 3.2 | 5.9  | 19.2  | 19.1  | 23.6  | 19.7  | 9.4  | 2008   | 603.2                                  | 4.4  | 6.4  | 23.3  | 21.6  | 23.8  | 16.2  | 4.4  | 432    | 253.1               |
|                                    | 32-34         | 4.1 | 6.1  | 22.9  | 21.2  | 23.5  | 15.9  | 6.2  | 801    | 247.8                                  | 7.7  | 6.9  | 29.6  | 23.8  | 21.1  | 9.2   | 1.9  | 134    | 76.8                |
|                                    | 35-37         | 6.3 | 7.3  | 25.5  | 22.9  | 21.6  | 11.8  | 4.5  | 274    | 90.7                                   | 12.9 | 9.8  | 34.1  | 24.6  | 12.7  | 5.6   | 0.4  | 36     | 19.7                |
|                                    | 38+           | 9.3 | 9.8  | 29.2  | 21.8  | 18.1  | 9.1   | 2.6  | 178    | 42.6                                   | 16.0 | 15.6 | 35.2  | 19.1  | 11.2  | 2.9   | 0.0  | 3      | 3.7                 |
| <b>No of children</b>              | 3             | 2.4 | 5.7  | 15.9  | 16.2  | 21.7  | 21.7  | 16.4 | 15093  | 3676.7                                 | 2.3  | 6.1  | 15.9  | 15.6  | 21.5  | 22.1  | 16.5 | 10015  | 3879.1              |
|                                    | 4             | 1.7 | 12.4 | 24.7  | 18.9  | 18.9  | 13.3  | 10.1 | 6082   | 1210.0                                 | 1.6  | 13.4 | 26.2  | 19.4  | 19.7  | 13.2  | 6.4  | 3981   | 1308.8              |
|                                    | No            | 2.4 | 7.7  | 19.3  | 18.0  | 22.1  | 19.8  | 10.7 | 19234  | 4503.3                                 | 2.3  | 8.3  | 19.5  | 17.4  | 21.8  | 19.7  | 11.1 | 12918  | 4863.3              |
| <b>Change co-parent</b>            | Yes           | 0.1 | 3.6  | 3.4   | 4.2   | 7.9   | 17.5  | 63.3 | 1941   | 383.4                                  | 0.3  | 1.7  | 4.1   | 5.1   | 10.3  | 21.9  | 56.5 | 1078   | 324.6               |
|                                    | All           | 2.2 | 7.4  | 18.1  | 16.9  | 21.0  | 19.6  | 14.8 | 21175  | 4886.7                                 | 2.2  | 7.9  | 18.5  | 16.6  | 21.1  | 20.0  | 13.9 | 13996  | 5187.9              |

b) Interval from third to fourth birth (parents with four children)

|                                    |               | Men |      |       |       |       |       |      |        | Women                                  |      |      |       |       |       |       |      |        |                     |
|------------------------------------|---------------|-----|------|-------|-------|-------|-------|------|--------|----------------------------------------|------|------|-------|-------|-------|-------|------|--------|---------------------|
|                                    |               |     |      |       |       |       |       |      |        | Interval since previous birth (months) |      |      |       |       |       |       |      |        |                     |
|                                    |               | 0   | 1-17 | 18-29 | 30-41 | 42-59 | 60-89 | 90+  | Deaths | Person years (000s)                    | 0    | 1-17 | 18-29 | 30-41 | 42-59 | 60-89 | 90+  | Deaths | Person years (000s) |
| <b>Education</b>                   | 10 years      | 3.3 | 8.7  | 18.8  | 15.9  | 17.7  | 19.2  | 16.5 | 2559   | 364.0                                  | 3.4  | 8.5  | 17.9  | 15.4  | 18.2  | 19.7  | 17.0 | 2256   | 525.3               |
|                                    | 11-13         | 4.3 | 7.0  | 18.6  | 15.7  | 18.5  | 19.3  | 16.7 | 2667   | 544.4                                  | 4.4  | 7.2  | 18.4  | 15.3  | 18.2  | 20.1  | 16.4 | 1375   | 550.5               |
|                                    | 14-17         | 5.3 | 5.8  | 19.8  | 17.7  | 18.9  | 17.7  | 14.8 | 602    | 203.3                                  | 5.6  | 5.8  | 20.9  | 17.9  | 20.1  | 18.1  | 11.6 | 330    | 210.2               |
|                                    | 18+           | 5.6 | 5.0  | 21.4  | 18.9  | 20.5  | 16.3  | 12.3 | 244    | 98.3                                   | 6.0  | 4.9  | 21.5  | 21.1  | 21.5  | 15.7  | 9.3  | 20     | 22.8                |
| <b>Marital status</b>              | Never-married | 7.3 | 8.6  | 22.6  | 18.4  | 16.3  | 15.8  | 11.1 | 53     | 17.7                                   | 9.8  | 8.2  | 23.1  | 15.5  | 13.4  | 16.7  | 13.3 | 28     | 13.8                |
|                                    | Married       | 4.3 | 6.8  | 18.8  | 16.5  | 19.0  | 19.5  | 15.0 | 4151   | 987.7                                  | 4.2  | 6.9  | 18.3  | 15.9  | 19.1  | 20.3  | 15.3 | 2509   | 1015.1              |
|                                    | Div/sep       | 3.6 | 8.7  | 19.8  | 15.2  | 16.2  | 15.4  | 21.1 | 1664   | 189.8                                  | 4.2  | 9.7  | 19.8  | 14.8  | 16.2  | 16.4  | 19.0 | 900    | 197.9               |
|                                    | Widowed       | 3.7 | 7.8  | 20.9  | 16.4  | 16.3  | 18.4  | 16.5 | 214    | 14.8                                   | 3.4  | 8.5  | 19.6  | 17.7  | 18.4  | 18.3  | 14.1 | 544    | 81.9                |
| <b>Age at 1<sup>st</sup> birth</b> | <20           | 2.3 | 8.1  | 17.5  | 14.2  | 17.2  | 18.7  | 22.1 | 376    | 58.6                                   | 2.9  | 8.5  | 17.1  | 14.3  | 17.1  | 18.9  | 21.2 | 1160   | 297.8               |
|                                    | 20-22         | 3.0 | 7.8  | 17.2  | 15.2  | 17.6  | 18.5  | 20.7 | 1781   | 300.5                                  | 3.5  | 7.7  | 17.6  | 14.9  | 18.0  | 20.7  | 17.6 | 1670   | 515.0               |
|                                    | 23-25         | 3.9 | 7.0  | 18.1  | 15.8  | 18.5  | 19.8  | 16.9 | 2091   | 408.1                                  | 5.0  | 6.5  | 19.1  | 16.7  | 19.5  | 20.4  | 12.9 | 783    | 311.6               |
|                                    | 26-28         | 5.0 | 6.6  | 20.1  | 16.6  | 19.3  | 19.5  | 12.9 | 1141   | 266.9                                  | 6.6  | 6.4  | 21.5  | 18.6  | 21.6  | 17.7  | 7.6  | 271    | 131.4               |
|                                    | 29-31         | 6.1 | 6.3  | 21.9  | 18.8  | 20.1  | 17.0  | 9.9  | 439    | 112.6                                  | 7.6  | 7.5  | 26.3  | 20.9  | 20.3  | 13.1  | 4.3  | 67     | 39.9                |
|                                    | 32-34         | 7.0 | 7.3  | 24.9  | 22.1  | 18.3  | 13.9  | 6.3  | 171    | 43.2                                   | 10.5 | 6.1  | 33.8  | 24.9  | 15.2  | 8.5   | 1.1  | 24     | 10.7                |
|                                    | 35-37         | 8.6 | 7.5  | 29.3  | 21.3  | 16.9  | 12.3  | 3.9  | 52     | 14.0                                   | 20.5 | 17.5 | 33.9  | 23.1  | 12.5  | 3.0   | 0.0  | 5      | 2.1                 |
|                                    | 38+           | 9.1 | 9.2  | 32.7  | 21.7  | 14.5  | 8.7   | 4.1  | 31     | 6.2                                    | 11.9 | 15.6 | 20.9  | 25.1  | 16.0  | 0.0   | 0.0  | 1      | 0.3                 |
| <b>Change co-parent</b>            | No            | 4.6 | 7.4  | 20.4  | 17.4  | 19.4  | 18.9  | 12.0 | 5486   | 1112.7                                 | 4.5  | 7.8  | 19.6  | 16.6  | 19.1  | 19.4  | 13.0 | 3685   | 1226.3              |
|                                    | Yes           | 0.1 | 4.6  | 4.2   | 4.3   | 8.4   | 17.0  | 61.4 | 596    | 97.3                                   | 0.4  | 1.9  | 4.3   | 4.3   | 9.9   | 22.2  | 57.0 | 296    | 82.4                |
| <b>All</b>                         |               | 4.2 | 7.1  | 19.1  | 16.3  | 18.5  | 18.7  | 15.9 | 6082   | 1210.0                                 | 4.2  | 7.5  | 18.7  | 15.8  | 18.5  | 19.6  | 15.7 | 3981   | 1308.8              |

**Supplemental Table 2.** Associations between length of inter-birth interval, period, age group, education, marital status, age at first birth and change of co-parent since previous birth and mortality 1980-2008 (Odds Ratios and 95% confidence intervals from fully adjusted discrete-time hazards models), men and women born 1935 -1968 and aged 40-73 with 2-4 children.

|                                                                          |               | Men     |               | Women   |               |
|--------------------------------------------------------------------------|---------------|---------|---------------|---------|---------------|
|                                                                          |               | Model 3 |               | Model 3 |               |
| <b>Interval between 1<sup>st</sup> and 2<sup>nd</sup> birth (months)</b> | 0 (multiple)  | 1.05    | (0.95-1.16)   | 1.15*   | (1.01-1.30)   |
|                                                                          | 0>18          | 1.17**  | (1.13-1.21)   | 1.13**  | (1.08-1.17)   |
|                                                                          | 18-29         | 1.05**  | (1.02-1.08)   | 1.02    | (0.99-1.06)   |
|                                                                          | 30-41         | 1       |               | 1       |               |
|                                                                          | 42-59         | 0.99    | (0.96-1.02)   | 0.97    | (0.94-1.01)   |
|                                                                          | 60-89         | 1.01    | (0.97-1.00)   | 1.01    | (0.97-1.06)   |
|                                                                          | 90+           | 0.96    | (0.92-1.01)   | 0.95    | (0.90-1.00)   |
| <b>Period</b>                                                            | 1980-84       | 1       |               | 1       |               |
|                                                                          | 1985-89       | 0.93*   | (0.88-1.00)   | 1.03    | (0.95-1.12)   |
|                                                                          | 1990-94       | 0.75**  | (0.71-0.80)   | 0.91*   | (0.84-0.99)   |
|                                                                          | 1995-99       | 0.65**  | (0.61-0.69)   | 0.86**  | (0.80-0.94)   |
|                                                                          | 2000-04       | 0.55**  | (0.52-0.58)   | 0.81**  | (0.75-0.88)   |
|                                                                          | 2005-08       | 0.49**  | (0.46-0.52)   | 0.75**  | (0.69-0.81)   |
| <b>Age group</b>                                                         | 40-44         | 1       |               | 1       |               |
|                                                                          | 45-49         | 1.78**  | (1.71-1.86)   | 1.73**  | (1.64-1.81)   |
|                                                                          | 50-54         | 2.99**  | (2.87-3.11)   | 2.79**  | (2.66-2.93)   |
|                                                                          | 55-59         | 5.03**  | (4.82-5.24)   | 4.50**  | (4.28-4.72)   |
|                                                                          | 60-64         | 8.82**  | (8.45-9.21)   | 6.88**  | (6.53-7.24)   |
|                                                                          | 65-69         | 14.88** | (14.20-15.59) | 10.56** | (9.98-11.2)   |
|                                                                          | 70-73         | 22.52** | (21.20-23.92) | 15.13** | (14.07-16.28) |
| <b>Education (Years)</b>                                                 | 10            | 1       |               | 1       |               |
|                                                                          | 11-13         | 0.75**  | (0.73-0.76)   | 0.70**  | (0.68-0.72)   |
|                                                                          | 14-17         | 0.57**  | (0.55-0.59)   | 0.55**  | (0.53-0.57)   |
|                                                                          | 18+           | 0.46**  | (0.44-0.48)   | 0.48**  | (0.43-0.53)   |
| <b>Marital status</b>                                                    | Never-married | 1.61**  | (1.50-1.73)   | 1.28**  | (1.16-1.42)   |
|                                                                          | Married       | 1       |               | 1       |               |
|                                                                          | Widowed       | 1.60**  | (1.56-1.69)   | 1.38**  | (1.32-1.43)   |
|                                                                          | Divorced/sep. | 2.06**  | (2.01-2.11)   | 1.55**  | (1.51-1.60)   |
| <b>Age at first birth</b>                                                | <20           | 1.30**  | (1.23-1.37)   | 1.25**  | (1.20-1.30)   |
|                                                                          | 20-22         | 1.15**  | (1.12-1.18)   | 1.09**  | (1.05-1.12)   |
|                                                                          | 23-25         | 1       |               | 1       |               |
|                                                                          | 26-28         | 0.91**  | (0.89-0.94)   | 0.98    | (0.94-1.02)   |

|                  |       |                    |                    |
|------------------|-------|--------------------|--------------------|
|                  | 29-31 | 0.90** (0.87-0.93) | 0.98 (0.93-1.03)   |
|                  | 32-34 | 0.88** (0.84-0.92) | 1.03 (0.95-1.11)   |
|                  | 35-37 | 0.83** (0.77-0.88) | 0.90 (0.79-1.03)   |
|                  | 38+   | 0.84** (0.78-0.90) | 0.82 (0.65-1.04)   |
| <b>Number</b>    | 2     | 1                  | 1                  |
| <b>of</b>        | 3     | 0.93** (0.91-0.95) | 0.89** (0.87-0.92) |
| <b>children</b>  | 4     | 0.94** (0.91-0.96) | 0.86** (0.83-0.89) |
| <b>Change of</b> | No    | 1                  | 1                  |
| <b>co-parent</b> | Yes   | 1.24** (1.19-1.29) | 1.33** (1.27-1.39) |
